# Supplementary material
Source: PubMed Central journal article supplement (PMC3369506)
Supplement: supp_WNL.0b013e318259e183_Figure_e-1.pdf [file supp_WNL.0b013e318259e183_Figure_e-1.pdf]

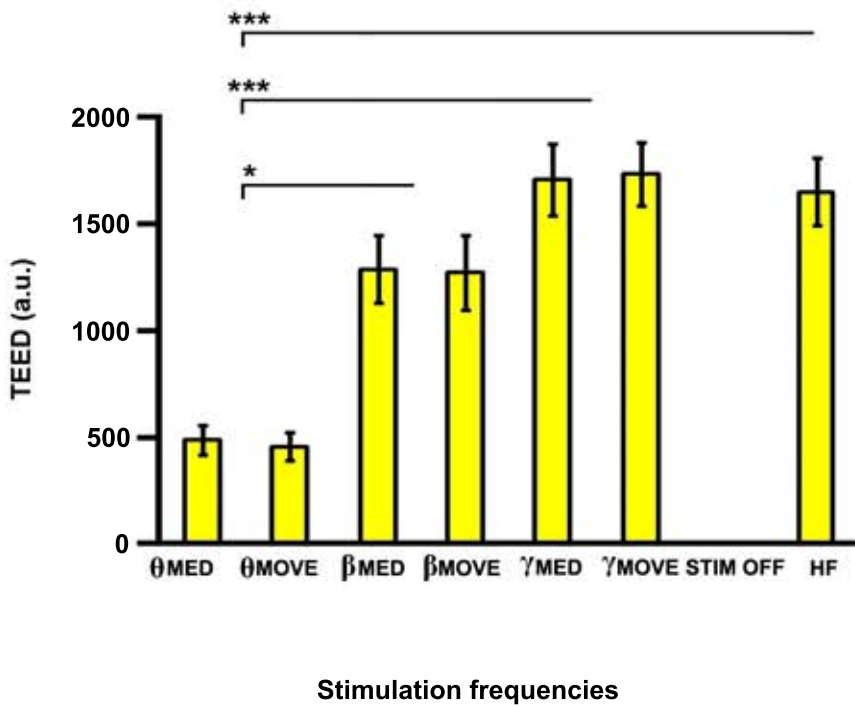

**Figure e-1. The effects of DBS frequencies on total electrical energy delivered.**

TEED, total electrical energy delivered; MED, individualized dopamine-dependent frequencies; MOVE, individualized movement-related frequencies; STIM OFF, STN DBS turned off; HF, high frequencies used for chronic DBS; \*,  $P = 0.002$ ; \*\*\*,  $P = 0.0003$ . Error bar indicates one standard error of the mean.
